# Supplementary material for: Enhanced oxygen reduction at Pd catalytic nanoparticles dispersed onto heteropolytungstate-assembled poly(diallyldimethylammonium)-functionalized carbon nanotubes
Source: Royal Society of Chemistry journal article supplement (doi:10.1039/c0cp02036b), 2011-01-01
Supplement: c0cp02036b.pdf [file c0cp02036b.pdf]

# Enhanced Oxygen Reduction at Pd Catalytic Nanoparticles Dispersed onto Heteropolytungstate-Assembled Poly(diallyldimethylammonium)-Functionalized Carbon Nanotubes

Deli Wang,<sup>a</sup> Shanfu Lu,<sup>b</sup> Pawel J. Kulesza,<sup>c</sup> Chang Ming Li,<sup>d</sup> Roland De Marco,<sup>c</sup> San Ping Jiang,<sup>a,\*</sup>

## 1. EDS element mapping

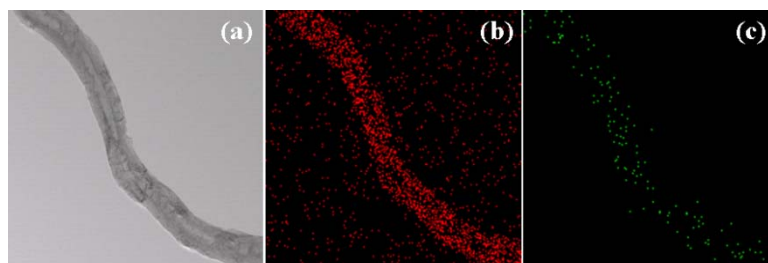

**Figure S1.** TEM image of HPW assembled PDDA-MWCNTs(a) and element distributions of C (b) and W (c).

## 2. TEM images and histograms of Pd/acid treated-MWCNTs

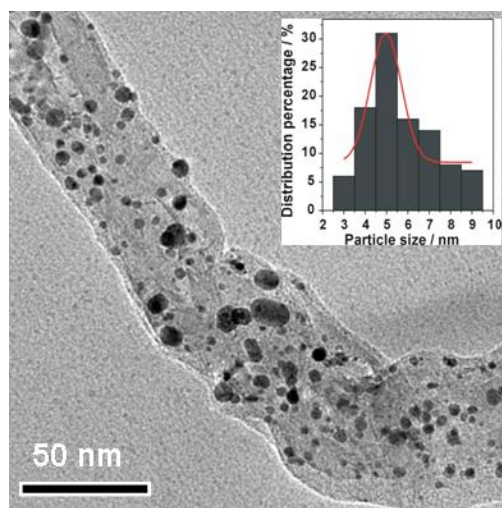

**Figure S2.** TEM images and histograms of Pd/acid treated-MWCNTs with Pd loading of 20wt%.
